# Supplementary material for: Views of nurses on causes of absenteeism at selected regional public hospitals of Limpopo Province, South Africa: A qualitative study
Source: Research Square preprint supplement (doi:10.21203/rs.3.rs-6071001/v1), 2025-04-30
Supplement: Supplementary file 1 [file 2c3a92d20ab034eeaa42ae0f.docx]

# **ANNEXURE A: INTERVIEW GUIDE**

**CUASES OF ABSEENTISM**

**SECTION A: DEMOGRAPHIC CHARACTERISTICS OF PARTICIPANTS**

| **1. Gender** | Female |  |
| --- | --- | --- |
| Male |  |

| **2. Age** | 20-29 years |  |
| --- | --- | --- |
| 30-39 years |  |
| 40-49 |  |
| 50-59 |  |
| 60 years and above |  |

| **3. Highest Educational Qualification** | Diploma |  |
| --- | --- | --- |
| Degree |  |
| Honours |  |
| Masters |  |
| Doctoral |  |

| **4.Years of service as a professional nurse** | 1-9 years |  |
| --- | --- | --- |
| 10 to 19 years  20 years and more |  |

**SECTION B: FACTORS/ CAUSES OF ABSEENTISM**

1. Can you share with me in your own views the factors or causes that are contributing to absenteeism amongst nurses in this hospital?

**Probing questions**

1. How does absenteeism affect your work as a nurse in the ward?

2. What suggestions can you give that you think may reduce absenteeism in hospitals?
